# Supplementary material for: Kinetic study of liquid phase glycerol hydrodeoxygenation under inert conditions over a Cu-based catalyst
Source: Royal Society of Chemistry journal article supplement (doi:10.1039/c8re00061a), 2018-01-01
Supplement: c8re00061a1.pdf [file c8re00061a1.pdf]

## Supporting Information

### **Kinetic study of liquid phase glycerol hydrodeoxygenation under inert conditions over Cu-based catalyst**

**V.-L. Yfanti<sup>a</sup>, D. Ipsakis<sup>a,b</sup>, A.A. Lemonidou<sup>a,b\*</sup>**

<sup>a</sup>Department of Chemical Engineering, Aristotle University of Thessaloniki, University Campus, GR-54124  
Thessaloniki, Greece

<sup>b</sup>Chemical Process & Energy Resources Institute (CPERI/CERTH), P.O. Box 60361 Thermi, Thessaloniki 57001,  
Greece

Corresponding author

Angeliki A. Lemonidou

Phone: +30 2310 996273

Fax: +30 2310 996184

Email: [alemonidou@cheng.auth.gr](mailto:alemonidou@cheng.auth.gr)

### **Catalyst characterization:**

The surface area of the fresh calcined sample was determined by N<sub>2</sub> adsorption at –469K using a multipoint BET analysis method with an Autosorb-1 Quantachrome flow apparatus. Prior to the measurements, the samples were treated under vacuum at 523K overnight.

The reduction characteristics of the catalysts (Figure S1) were studied by temperature-programmed reduction (TPR). These experiments were performed in a gas flow system equipped with a quadrupole mass analyser (OmniStar™, PFEIFFER). Typically, a catalyst sample (100 mg) was placed in a U-shaped quartz reactor and pre-treated in flowing He for 0.5 h at 523K, followed by cooling at room temperature. After the pre-treatment, the temperature was raised from room temperature to 773K at a rate of 10 K min<sup>-1</sup> in a 10% H<sub>2</sub>/He flow.

The active copper metal surface area was determined by a dissociative N<sub>2</sub>O adsorption method. The experiment was performed in a gas flow system equipped with a quadrupole mass analyzer (OmniStar™, PFEIFFER). Typically, a fresh catalyst sample (150 mg) was placed in a U-shaped quartz reactor and pre-treated in flowing He for 0.5 h at 523K, followed by cooling at room temperature. Catalyst pre-reduction was performed by raising the temperature to the reduction temperature (543K) at a ramp rate of 10 °C min<sup>-1</sup> in a 10% H<sub>2</sub>/He flow for 0.5 h, followed by cooling to 323K under He flow. Then, the sample was exposed to N<sub>2</sub>O flow for 0.5 h at 323K in order to oxidize the surface CuO to Cu<sub>2</sub>O by adsorptive decomposition of N<sub>2</sub>O. Finally, TPR was carried out on the freshly oxidized Cu<sub>2</sub>O surface in order to reduce Cu<sub>2</sub>O to metallic Cu, increasing the temperature from room to 723K with 10 °C min<sup>-1</sup> ramp rate using 10% H<sub>2</sub>/He flow. Copper surface area and particle size was calculated using data adopted from the literature [G. Ertl, H. Knozinger and J. Weitkamp, Handbook of Heterogeneous Catalysis, Wiley-VCH, Germany, 1997, vol. 2.].

The diffractogram of the catalyst (Figure S2) was obtained using a Siemens D500 diffractometer with Cu K $\alpha$  radiation.

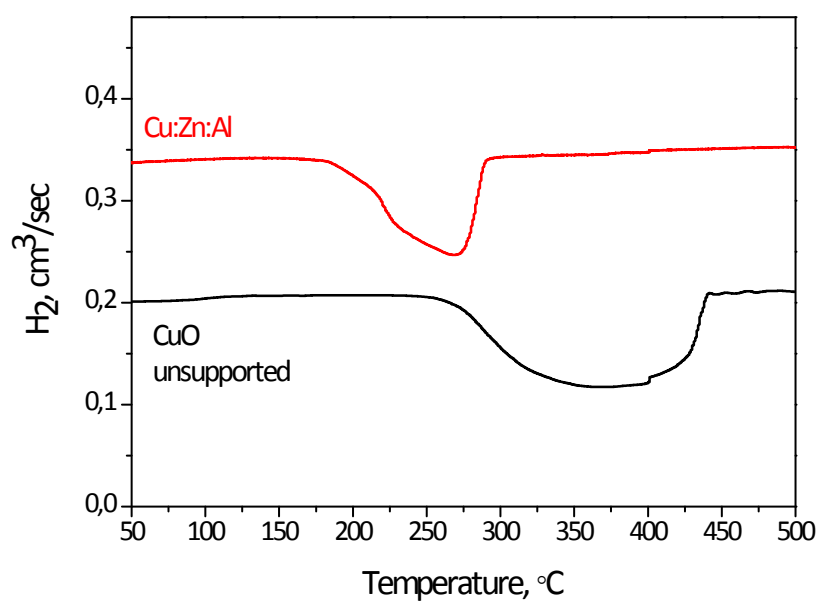

**Figure S1:** TPR patterns of the Cu:Zn:Al catalyst and CuO unsupported oxide

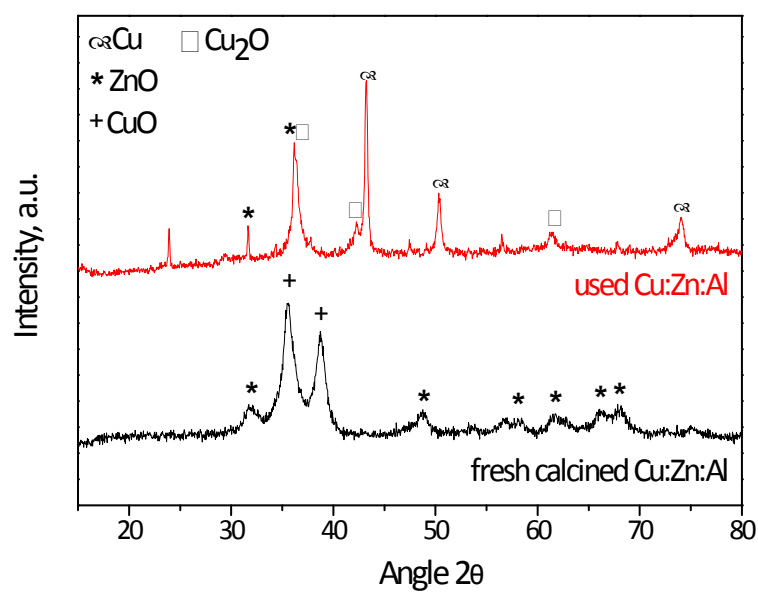

**Figure S2:** XRD patterns of the fresh calcined and used Cu:Zn:Al catalyst

## Weisz – Prater criterion

The Weisz – Prater parameter was calculated by using the following equation:

$$C_{WP} = \frac{-r_{obs} \cdot \rho_c \cdot R^2}{De \cdot C_{AS}}$$

where,  $-r_{obs}$  = the observed reaction rate =  $6.92 \cdot 10^{-6} \text{ mol g}_{cat}^{-1} \text{ sec}^{-1}$ ,

$\rho_c$  = solid catalyst density =  $2.08 \text{ g cm}^{-3}$ ,

$R$  = catalyst particle radius =  $0.0025 \text{ cm}$ ,

$C_{AS}$  = concentration of glycerol at catalyst surface =  $1.3 \cdot 10^{-4} \text{ mol cm}^{-3}$ .

$$1) De = \frac{D_{AB} \cdot \phi \cdot \sigma}{\tau} \quad \text{effective diffusivity of glycerol to water at 523K} = 2.11 \cdot 10^{-5} \text{ cm}^2 \cdot \text{sec}^{-1}$$

$$2) De = \frac{D_{AB} \cdot \phi \cdot \sigma}{\tau} \quad \text{effective diffusivity of glycerol to methanol at 523K} = 4.81 \cdot 10^{-5} \text{ cm}^2 \cdot \text{sec}^{-1}$$

where,

$\phi = 0.42$  pellet porosity,  $\sigma = 0.8$  constriction factor [Fogler],  $\tau = 3$  tortuosity [Fogler]

The diffusion coefficient was calculated using the WILKE – CHANG equation:

$$1) D_{AB} = \text{diffusion coefficient of glycerol to water at 523K} = 1.85 \cdot 10^{-4} \text{ cm}^2 \cdot \text{sec}^{-1}$$

$$2) D_{AB} = \text{diffusion coefficient of glycerol to methanol at 523K} = 4.20 \cdot 10^{-4} \text{ cm}^2 \cdot \text{sec}^{-1}$$

Values of Weisz – Prater parameter:

$$C_{WP \text{ GLYCEROL - WATER}} = 0.033 < 1$$

$$C_{WP \text{ GLYCEROL - METHANOL}} = 0.014 < 1$$

### Mears criterion

$$C_{mears} = \frac{-r_A p_b R n}{k_c C_{Ab}}$$

$-r_A$  = the observed reaction rate =  $6.92 \cdot 10^{-6} \text{ mol g}_{\text{cat}}^{-1} \text{ sec}^{-1}$

$n$  = reaction order = 1

$R$  = catalyst particle radius = 0.0025 cm,

$p_b$  = bulk density =  $1.19 \text{ gr} \cdot \text{cm}^{-3}$

$C_{AS}$  = concentration of glycerol in solution =  $1.3 \cdot 10^{-4} \text{ mol cm}^{-3}$

$$1) k_c = \frac{Sh \cdot D_{AB}}{d_p} \quad \text{mass transfer coefficient glycerol - water = m/s}$$

$Sh = 2 + 0.6 \cdot Re^{0.5} \cdot Sc^{1/3}$  = Sherwood number = 23.1

$Sc = \nu / D_{AB}$  = Schmidt number = 7.36

$\nu$  = kinetic viscosity of water at 523K =  $1.36 \cdot 10^{-3} \text{ cm}^2/\text{s}$

$D_{AB}$  = diffusion coefficient of glycerol to water at 523K =  $1.85 \cdot 10^{-4} \text{ cm}^2 \cdot \text{sec}^{-1}$

$$Re = \frac{U \cdot \rho \cdot d_p}{\mu} \quad \text{Reynolds number} = 326.4$$

$U$  = superficial velocity = 0.89 m/s

$\rho$  = density of water at 523K =  $799 \text{ kg} \cdot \text{m}^{-3}$

$\mu$  = dynamic viscosity of water at 523K =  $1.1 \cdot 10^{-4} \text{ kg} \cdot \text{s}^{-1} \cdot \text{m}^{-1}$

$d_p$  = catalyst particle diameter =  $5 \cdot 10^{-5} \text{ m}$

$$2) k_c = \frac{Sh \cdot D_{AB}}{d_p} \quad \text{mass transfer coefficient glycerol - methanol = m/s}$$

$$\mathbf{Sh} = 2 + 0.6 \cdot \text{Re}^{0.5} \cdot \text{Sc}^{1/3} = \text{Sherwood number} = 16.8$$

$$\mathbf{Sc} = \nu / D_{AB} = \text{Schmidt number} = 5.2$$

$$\nu = \text{kinetic viscosity of methanol at 523K} = 2.2 \cdot 10^{-3} \text{ cm}^2/\text{s}$$

$$D_{AB} = \text{diffusion coefficient of glycerol to methanol at 523K} = 4.2 \cdot 10^{-4} \text{ cm}^2 \cdot \text{sec}^{-1}$$

$$\text{Re} = \frac{U \cdot \rho \cdot d_p}{\mu} \quad \text{Reynolds number} = 203.5$$

$$U = \text{superficial velocity} = 0.89 \text{ m/s}$$

$$\rho = \text{density of water at 523K} = 250 \text{ kg} \cdot \text{m}^{-3}$$

$$\mu = \text{dynamic viscosity of water at 523K} = 5.5 \cdot 10^{-5} \text{ kg} \cdot \text{s}^{-1} \cdot \text{m}^{-1}$$

$$d_p = \text{catalyst particle diameter} = 5 \cdot 10^{-5} \text{ m}$$

Values of Mears criterion

$$1) \frac{-r_A \rho_b R n}{k_c C_{Ab}}_{\text{GLYCEROL - WATER}} = 1.85 \cdot 10^{-4} < 0.15$$

$$2) \frac{-r_A \rho_b R n}{k_c C_{Ab}}_{\text{GLYCEROL - METHANOL}} = 1.12 \cdot 10^{-4} < 0.15$$

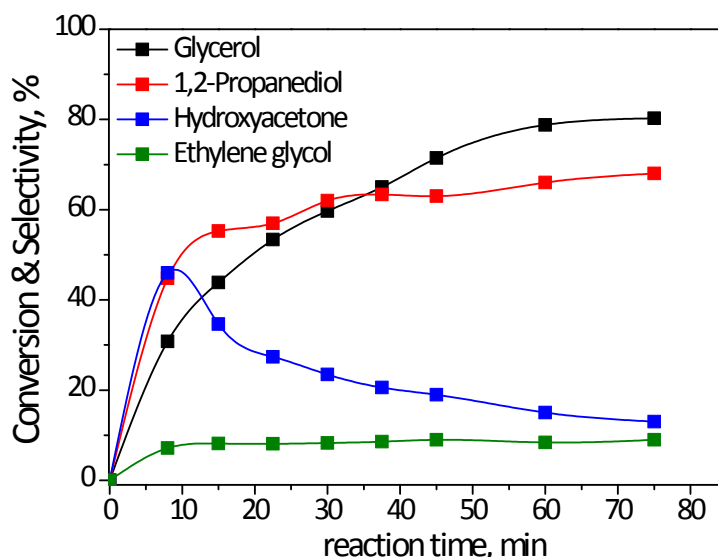

**Figure S3:** Effect of reaction time on glycerol conversion and product selectivity. Experimental conditions: aq. solution of 1wt% glycerol and 30wt% methanol,  $m_{\text{glycerol}}/m_{\text{catalyst}} = 2.4$ , 3.0MPa  $N_2$  523K, 0-75min.

## RDS selection

**Case 1 (hydrogen formation RDS = the dehydrogenation of methoxy species to formaldehyde).**

The overall reactions that describe the four reaction steps along with the resulting four rate equations are presented in Table S1. The parity plots for each reaction compound are depicted in Figure S1.

**Table S1:** Elementary reactions and rate equations (Case 1)

|                                                           | Elementary reactions                                                                                                                                                                                                                                                | Rate equations                                                             |
|-----------------------------------------------------------|---------------------------------------------------------------------------------------------------------------------------------------------------------------------------------------------------------------------------------------------------------------------|----------------------------------------------------------------------------|
| <b>1<sup>st</sup> step -</b><br>H <sub>2</sub> formation  | $H_2O + * \leftrightarrow H_2O^*$<br>$H_2O^* + * \leftrightarrow OH^* + H^*$<br>$CH_3OH + 2* \leftrightarrow CH_3O^* + H^*$<br>$CH_3O^* + * \rightarrow CH_2O^* + H^*$ <b>RDS_1</b><br>:<br>$CO^* + OH^* \rightarrow H^* + CO_2$<br>$2H^* \leftrightarrow H_2 + 2*$ | $r_1 = \frac{k_1 K_{CH_3OH} C_{CH_3OH} (K_{H_2} C_{H_2})^{-0.5}}{(DEN)^2}$ |
| <b>2<sup>nd</sup> step -</b><br>Hydroxyacetone formation  | $G + * \leftrightarrow G^*$<br>$G^* + * \rightarrow HA^* + H_2O^*$ <b>RDS_2</b><br>$HA^* \leftrightarrow HA + *$                                                                                                                                                    | $r_2 = \frac{k_2 K_G C_G}{(DEN)^2}$                                        |
| <b>3<sup>rd</sup> step -</b><br>1,2-propanediol formation | $HA^* + H^* \rightarrow HAH^* + *$<br>$HAH^* + H^* \leftrightarrow 1,2-PDO^* + *$ <b>RDS_3</b>                                                                                                                                                                      | $r_3 = k_3 \frac{K_{HAH} K_{HA} K_{H_2} C_{H_2} - K_{PG} C_{PG}}{(DEN)^2}$ |

|                                                                                                                   |                                                                                                                            |                                                             |
|-------------------------------------------------------------------------------------------------------------------|----------------------------------------------------------------------------------------------------------------------------|-------------------------------------------------------------|
|                                                                                                                   | 1,2-PDO* $\leftrightarrow$ 1,2-PDO + *                                                                                     |                                                             |
| <b>4<sup>th</sup> step –</b><br>ethylene glycol formation                                                         | $G^* + H^* \rightarrow GH^* + *$ <b>RDS_4</b><br>$GH^* + H^* \rightarrow EG^* + CH_3OH^*$<br>$EG^* \leftrightarrow EG + *$ | $r_4 = \frac{k_4 K_G C_G (K_{H_2} C_{H_2})^{0.5}}{(DEN)^2}$ |
| * = active site, G = glycerol, 1,2-PDO = 1,2-propanediol, EG = ethylene glycol, HA = hydroxyacetone, H = hydrogen |                                                                                                                            |                                                             |

Where,

$$DEN = 1 + K_G C_G + K_{CH_3OH} C_{CH_3OH} (K_{H_2} C_{H_2})^{-0.5} + K_{HA} C_{HA} + K_{PG} C_{PG} + (K_{H_2} C_{H_2})^{0.5} + K_{HAH} K_{HA} C_{HA} (K_{H_2} C_{H_2})^{0.5}$$

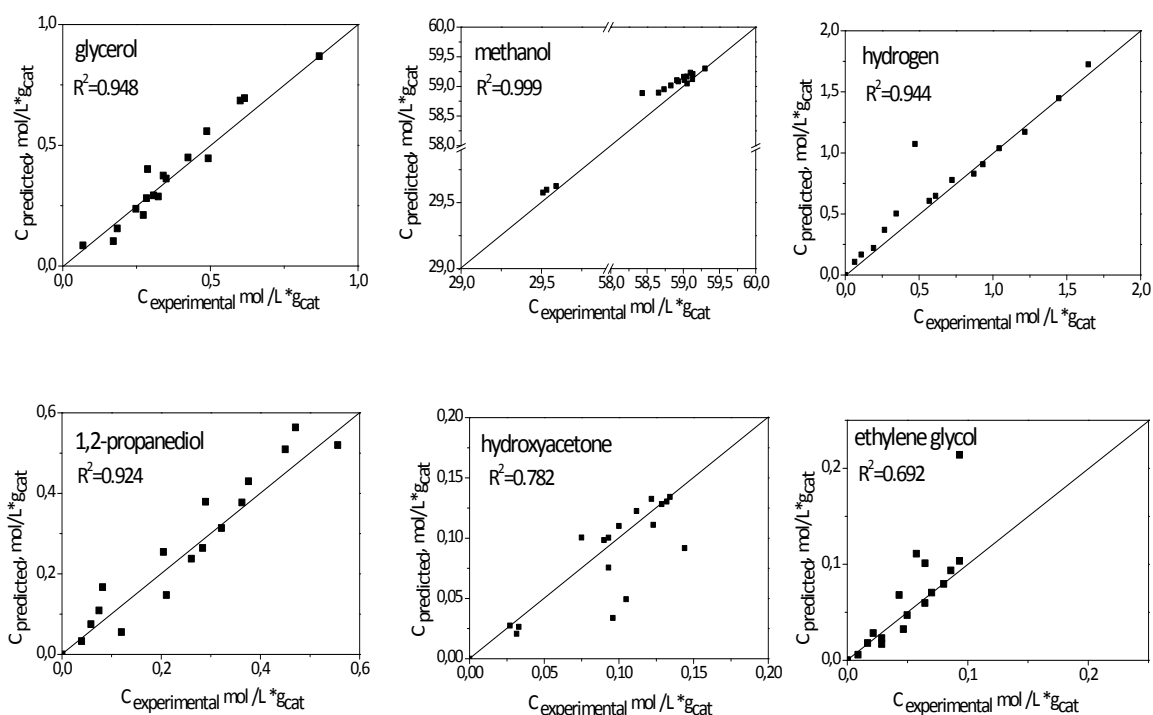

**Figure S4:** Parity plots of experimental and predicted (from the reaction model) values of reactants and products outlet concentrations – Case 1. Experimental conditions: aq. solution of 1wt% glycerol and 30wt% methanol,  $m_{glycerol}/m_{catalyst} = 2.4$ , 3.0MPa  $N_2$ , 473-543K, 0-75min.



**Case 2: (Hydroxyacetone hydrogenation to 1,2-propanediol is one-step irreversible reaction).**

The overall reactions that describe the four reaction steps along with the resulting four rate equations are presented in Table S2. The results of the model are presented in Figure S5 as outlet concentration – time curves while in Table S3 are tabulated the values of all kinetic parameters, equilibrium and adsorption coefficients at 523K. The residual sum of squares in case 1 was 0.29.

**Table S2: Elementary reactions and rate equations (Case 2)**

|                                                                                                        | Elementary reactions                                                                                                                                                                                                                                                | Rate equations                                              |
|--------------------------------------------------------------------------------------------------------|---------------------------------------------------------------------------------------------------------------------------------------------------------------------------------------------------------------------------------------------------------------------|-------------------------------------------------------------|
| <b>1<sup>st</sup> step -</b><br>H <sub>2</sub> formation                                               | H <sub>2</sub> O + * ⇌ H <sub>2</sub> O*<br>H <sub>2</sub> O* + * ⇌ OH* + H*<br>CH <sub>3</sub> OH + * ⇌ CH <sub>3</sub> OH*<br><b>CH<sub>3</sub>OH* + * → CH<sub>3</sub>O* + H*    RDS_1</b><br>:<br>CO* + OH* → H* + CO <sub>2</sub><br>2H* ⇌ H <sub>2</sub> + 2* | $r_1 = k_1 \frac{K_{CH_3OH} C_{CH_3OH}}{(DEN)^2}$           |
| <b>2<sup>nd</sup> step -</b><br>Hydroxyacetone formation                                               | G + * ⇌ G*<br><b>G* + * → HA* + H<sub>2</sub>O*    RDS_2</b><br>HA* ⇌ HA + *                                                                                                                                                                                        | $r_2 = k_2 \frac{K_G C_G}{(DEN)^2}$                         |
| <b>3<sup>rd</sup> step -</b><br>1,2-propanediol formation                                              | <b>HA* + 2H* → 1,2-PDO* + 2*    RDS_3</b><br>1,2-PDO* ⇌ 1,2-PDO + *                                                                                                                                                                                                 | $r_3 = k_3 \frac{K_{HA} C_{HA} K_{H_2} C_{H_2}}{(DEN)^3}$   |
| <b>4<sup>th</sup> step -</b><br>ethylene glycol formation                                              | <b>G* + H* → GH* + *    RDS_4</b><br>GH* + H* → EG* + CH <sub>3</sub> OH*<br>EG* ⇌ EG + *                                                                                                                                                                           | $r_4 = k_4 \frac{K_G C_G (K_{H_2} C_{H_2})^{0.5}}{(DEN)^2}$ |
| *=active site, G=glycerol, 1,2-PDO=1,2-propanediol, EG=ethylene glycol, HA=hydroxyacetone, H =hydrogen |                                                                                                                                                                                                                                                                     |                                                             |

Where,

$$DEN = 1 + K_G C_G + K_{CH_3OH} C_{CH_3OH} + K_{HA} C_{HA} + K_{PG} C_{PG} + (K_{H_2} C_{H_2})^{0.5}$$

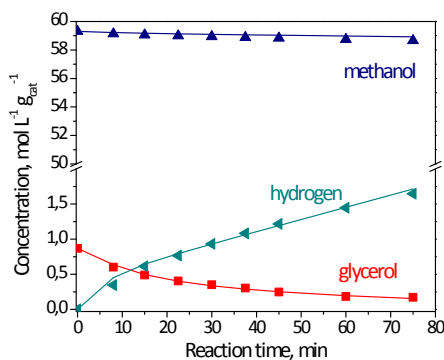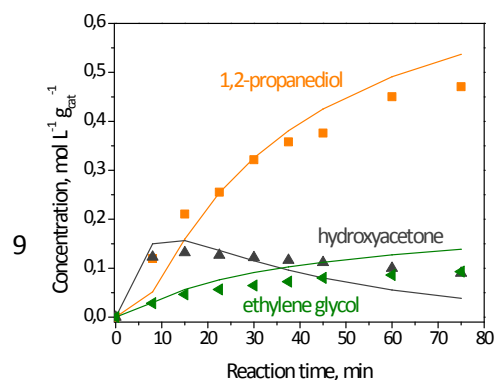

**Figure S5:** Experimental (points) and predicted (lines) values of reactants and products outlet concentrations as a function of reaction time (Case 2). Experimental conditions: aq. solution of 1wt% glycerol and 30wt% methanol,  $m_{\text{glycerol}}/m_{\text{catalyst}} = 2.4$ , , 3.0MPa  $N_2$ , 523 K, 0-75min.

**Table S3:** Estimated values of kinetic parameters (Case 2)

| Kinetic parameters            | Step 1)<br>Methanol<br>APR | Step 2)<br>Glycerol<br>dehydration | Step 3)<br>Hydroxyacetone<br>hydrogenation | Step 4)<br>Glycerol<br>hydrogenolysis |
|-------------------------------|----------------------------|------------------------------------|--------------------------------------------|---------------------------------------|
| $k_i, \text{min}^{-1}$ (523K) | $1.6 \cdot 10^6$           | $1.9 \cdot 10^7$                   | $2.0 \cdot 10^{10}$                        | $1.4 \cdot 10^7$                      |

| Adsorption coefficients                                    |                     |                     |                     |                     |                     |
|------------------------------------------------------------|---------------------|---------------------|---------------------|---------------------|---------------------|
|                                                            | Methanol            | Glycerol            | 1,2-propanediol     | Hydroxyacetone      | Hydrogen            |
| $K_j, g_{\text{cat}} \cdot L \cdot \text{mol}^{-1}$ (523K) | $1.1 \cdot 10^{-4}$ | $1.4 \cdot 10^{-3}$ | $9.9 \cdot 10^{-1}$ | $4.4 \cdot 10^{-2}$ | $1.9 \cdot 10^{-1}$ |

**Case 3: (Hydroxyacetone hydrogenation to 1,2-propanediol is two-step irreversible reaction).**

The overall reactions that describe the four reaction steps along with the resulting four rate equations are presented in Table S4. The results of the model are presented in Figure S6 as outlet concentration – time curves while in Table S5 are tabulated the values of all kinetic parameters, equilibrium and adsorption coefficients at 523K. The residual sum of squares in case 2 was 0.31.

**Table S4:** Elementary reactions and rate equations (Case 3)

|  | Elementary reactions | Rate equations |
|--|----------------------|----------------|
|  |                      |                |

|                                                                                                                   |                                                                                                                                                                                                                                                                                                                                                                                                                                                                  |                                                                                                             |
|-------------------------------------------------------------------------------------------------------------------|------------------------------------------------------------------------------------------------------------------------------------------------------------------------------------------------------------------------------------------------------------------------------------------------------------------------------------------------------------------------------------------------------------------------------------------------------------------|-------------------------------------------------------------------------------------------------------------|
| <b>1<sup>st</sup> step -</b><br>H <sub>2</sub> formation                                                          | $\begin{aligned} \text{H}_2\text{O} + * &\leftrightarrow \text{H}_2\text{O}^* \\ \text{H}_2\text{O}^* + * &\leftrightarrow \text{OH}^* + \text{H}^* \\ \text{CH}_3\text{OH} + * &\leftrightarrow \text{CH}_3\text{OH}^* \\ \text{CH}_3\text{OH}^* + * &\rightarrow \text{CH}_3\text{O}^* + \text{H}^* \quad \text{RDS}_1 \\ &: \\ \text{CO}^* + \text{OH}^* &\rightarrow \text{H}^* + \text{CO}_2 \\ 2\text{H}^* &\leftrightarrow \text{H}_2 + 2* \end{aligned}$ | $r_1 = k_1 \frac{K_{\text{CH}_3\text{OH}} C_{\text{CH}_3\text{OH}}}{(\text{DEN})^2}$                        |
| <b>2<sup>nd</sup> step -</b><br>Hydroxyacetone formation                                                          | $\begin{aligned} \text{G} + * &\leftrightarrow \text{G}^* \\ \text{G}^* + * &\rightarrow \text{HA}^* + \text{H}_2\text{O}^* \quad \text{RDS}_2 \\ \text{HA}^* &\leftrightarrow \text{HA} + * \end{aligned}$                                                                                                                                                                                                                                                      | $r_2 = k_2 \frac{K_G C_G}{(\text{DEN})^2}$                                                                  |
| <b>3<sup>rd</sup> step -</b><br>1,2-propanediol formation                                                         | $\begin{aligned} \text{HA}^* + \text{H}^* &\leftrightarrow \text{HAH}^* + * \\ \text{HAH}^* + \text{H}^* &\rightarrow \text{1,2-PDO}^* + * \quad \text{RDS}_3 \\ \text{1,2-PDO}^* &\leftrightarrow \text{1,2-PDO} + * \end{aligned}$                                                                                                                                                                                                                             | $r_3 = k_3 \frac{K_{\text{HAH}} K_{\text{HA}} C_{\text{HA}} K_{\text{H}_2} C_{\text{H}_2}}{(\text{DEN})^2}$ |
| <b>4<sup>th</sup> step -</b><br>ethylene glycol formation                                                         | $\begin{aligned} \text{G}^* + \text{H}^* &\rightarrow \text{GH}^* + * \quad \text{RDS}_4 \\ \text{GH}^* + \text{H}^* &\rightarrow \text{EG}^* + \text{CH}_3\text{OH}^* \\ \text{EG}^* &\leftrightarrow \text{EG} + * \end{aligned}$                                                                                                                                                                                                                              | $r_4 = k_4 \frac{K_G C_G (K_{\text{H}_2} C_{\text{H}_2})^{0.5}}{(\text{DEN})^2}$                            |
| * = active site, G = glycerol, 1,2-PDO = 1,2-propanediol, EG = ethylene glycol, HA = hydroxyacetone, H = hydrogen |                                                                                                                                                                                                                                                                                                                                                                                                                                                                  |                                                                                                             |

Where,  $\text{DEN} = 1 + K_G C_G + K_{\text{CH}_3\text{OH}} C_{\text{CH}_3\text{OH}} + K_{\text{HA}} C_{\text{HA}} + K_{\text{PG}} C_{\text{PG}} + (K_{\text{H}_2} C_{\text{H}_2})^{0.5} + K_{\text{HAH}} K_{\text{HA}} C_{\text{HA}} (K_{\text{H}_2} C_{\text{H}_2})^{0.5}$

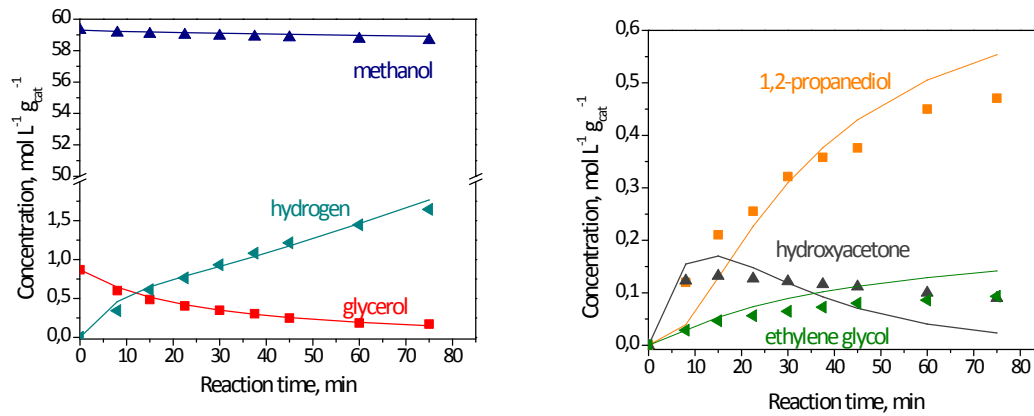

**Figure S6:** Experimental (points) and predicted (lines) values of reactants and products outlet concentrations as a function of reaction time (Case 3). Experimental conditions: aq. solution of 1wt% glycerol and 30wt% methanol,  $m_{\text{glycerol}}/m_{\text{catalyst}} = 2.4$ , 3.0MPa N<sub>2</sub>, 523 K, 0-75min.

**Table S5:** Estimated values of kinetic parameters (Case3)

| Kinetic | Step 1) | Step 2) | Step 3) | Step 4) |
|---------|---------|---------|---------|---------|
|---------|---------|---------|---------|---------|

| parameters                           | Methanol<br>APR  | Glycerol<br>dehydration | Hydroxyacetone<br>hydrogenation | Glycerol<br>hydrogenolysis |
|--------------------------------------|------------------|-------------------------|---------------------------------|----------------------------|
| $k_i, \text{min}^{-1} (523\text{K})$ | $9.6 \cdot 10^5$ | $1.7 \cdot 10^7$        | $2.6 \cdot 10^7$                | $2.0 \cdot 10^7$           |

| Adsorption coefficients                                                         |                     |                     |                 |                     |                     |
|---------------------------------------------------------------------------------|---------------------|---------------------|-----------------|---------------------|---------------------|
|                                                                                 | Methanol            | Glycerol            | 1,2-propanediol | Hydroxyacetone      | Hydrogen            |
| $K_j, \text{g}_{\text{cat}} \cdot \text{L} \cdot \text{mol}^{-1} (523\text{K})$ | $1.5 \cdot 10^{-4}$ | $1.3 \cdot 10^{-3}$ | 1.0             | $1.0 \cdot 10^{-2}$ | $5.2 \cdot 10^{-2}$ |
| Equilibrium coefficient                                                         |                     |                     |                 |                     |                     |
| Hydroxyacetone partial<br>hydrogenation, $K_{\text{HAH}}$                       | 8.1                 |                     |                 |                     |                     |

**Case 4: (Hydroxyacetone hydrogenation to 1,2-propanediol is one-step reversible reaction).** The overall reactions that describe the four reaction steps along with the resulting four rate equations are presented in Table S6. The results of the model are presented in Figure S7 as outlet concentration – time curves while in Table S7 are tabulated the values of all kinetic parameters, equilibrium and adsorption coefficients at 523K. The residual sum of squares in case 3 was 0.22.

**Table S6: Elementary reactions and rate equations (Case 4)**

|                                                           | Elementary reactions                                                                                                                                                                                                                                                                                                                                                                                                                   | Rate equations                                                                                                                        |
|-----------------------------------------------------------|----------------------------------------------------------------------------------------------------------------------------------------------------------------------------------------------------------------------------------------------------------------------------------------------------------------------------------------------------------------------------------------------------------------------------------------|---------------------------------------------------------------------------------------------------------------------------------------|
| <b>1<sup>st</sup> step -</b><br>H <sub>2</sub> formation  | $\text{H}_2\text{O} + * \leftrightarrow \text{H}_2\text{O}^*$<br>$\text{H}_2\text{O}^* + * \leftrightarrow \text{OH}^* + \text{H}^*$<br>$\text{CH}_3\text{OH} + * \leftrightarrow \text{CH}_3\text{OH}^*$<br>$\text{CH}_3\text{OH}^* + * \rightarrow \text{CH}_3\text{O}^* + \text{H}^* \quad \text{RDS}_1$<br>:<br>$\text{CO}^* + \text{OH}^* \rightarrow \text{H}^* + \text{CO}_2$<br>$2\text{H}^* \leftrightarrow \text{H}_2 + 2^*$ | $r_1 = k_1 \frac{K_{\text{CH}_3\text{OH}} C_{\text{CH}_3\text{OH}}}{(\text{DEN})^2}$                                                  |
| <b>2<sup>nd</sup> step -</b><br>Hydroxyacetone formation  | $\text{G} + * \leftrightarrow \text{G}^*$<br>$\text{G}^* + * \rightarrow \text{HA}^* + \text{H}_2\text{O}^* \quad \text{RDS}_2$<br>$\text{HA}^* \leftrightarrow \text{HA} + *$                                                                                                                                                                                                                                                         | $r_2 = k_2 \frac{K_G C_G}{(\text{DEN})^2}$                                                                                            |
| <b>3<sup>rd</sup> step -</b><br>1,2-propanediol formation | $\text{HA}^* + 2\text{H}^* \leftrightarrow 1,2\text{-PDO}^* + 2^* \quad \text{RDS}_3$<br>$1,2\text{-PDO}^* \leftrightarrow 1,2\text{-PDO} + *$                                                                                                                                                                                                                                                                                         | $r_3 = k_3 \frac{(K_{\text{HA}} C_{\text{HA}} K_{\text{H}_2} C_{\text{H}_2} - K_{\text{PG}} C_{\text{PG}} K_3^{-1})}{(\text{DEN})^3}$ |
| <b>4<sup>th</sup> step -</b><br>ethylene glycol formation | $\text{G}^* + \text{H}^* \rightarrow \text{GH}^* + *$<br>$\text{GH}^* + \text{H}^* \rightarrow \text{EG}^* + \text{CH}_3\text{OH}^*$                                                                                                                                                                                                                                                                                                   | $r_4 = k_4 \frac{K_G C_G (K_{\text{H}_2} C_{\text{H}_2})^{0.5}}{(\text{DEN})^2}$                                                      |

|                                                                                                        |
|--------------------------------------------------------------------------------------------------------|
| EG*      ↔    EG + *                                                                                   |
| *=active site, G=glycerol, 1,2-PDO=1,2-propanediol, EG=ethylene glycol, HA=hydroxyacetone, H =hydrogen |

Where,  $DEN = 1 + K_G C_G + K_{CH_3OH} C_{CH_3OH} + K_{HA} C_{HA} + K_{PG} C_{PG} + (K_{H_2} C_{H_2})^{0.5}$

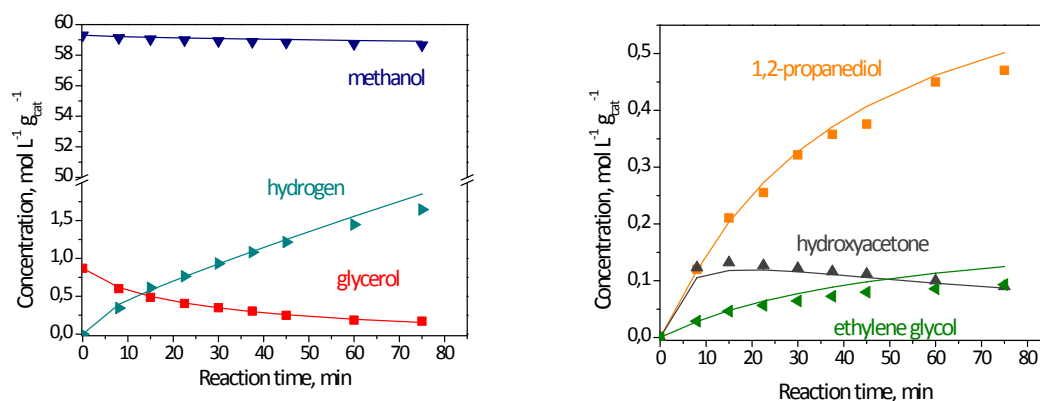

**Figure S7:** Experimental (points) and predicted (lines) values of reactants and products outlet concentrations as a function of reaction time (Case 4). Experimental conditions: aq. solution of 1wt% glycerol and 30wt% methanol,  $m_{\text{glycerol}}/m_{\text{catalyst}} = 2.4$ , 3.0MPa  $N_2$ , 523 K, 0-75min.

**Table S7:** Estimated values of kinetic parameters (Case4)

| Kinetic parameters | Step 1)<br>Methanol<br>APR | Step 2)<br>Glycerol<br>dehydration | Step 3)<br>Hydroxyacetone<br>hydrogenation | Step 4)<br>Glycerol<br>hydrogenolysis |
|--------------------|----------------------------|------------------------------------|--------------------------------------------|---------------------------------------|
|                    |                            |                                    |                                            |                                       |

|                                                                                 |                     |                     |                        |                       |                     |
|---------------------------------------------------------------------------------|---------------------|---------------------|------------------------|-----------------------|---------------------|
| $k_i, \text{min}^{-1} (523\text{K})$                                            | $6.0 \cdot 10^5$    | $3.7 \cdot 10^6$    | $2.3 \cdot 10^{10}$    | $1.1 \cdot 10^6$      |                     |
| <b>Adsorption coefficients</b>                                                  |                     |                     |                        |                       |                     |
|                                                                                 | <b>Methanol</b>     | <b>Glycerol</b>     | <b>1,2-propanediol</b> | <b>Hydroxyacetone</b> | <b>Hydrogen</b>     |
| $K_j, \text{g}_{\text{cat}} \cdot \text{L} \cdot \text{mol}^{-1} (523\text{K})$ | $5.0 \cdot 10^{-4}$ | $1.3 \cdot 10^{-2}$ | $9.7 \cdot 10^{-1}$    | $5.1 \cdot 10^{-1}$   | $9.5 \cdot 10^{-1}$ |
| <b>Equilibrium coefficient</b>                                                  |                     |                     |                        |                       |                     |
| <b>1,2-propanediol formation, <math>K_3</math></b>                              | 6.3                 |                     |                        |                       |                     |

**Case 5: (Hydroxyacetone hydrogenation to 1,2-propanediol is two-step reversible reaction).** The overall reactions that describe the four reaction steps along with the resulting four rate equations are presented in Table S8. The results of the model are presented in Figure S8 as outlet concentration – time curves while in Table S9 are tabulated the values of all kinetic parameters, equilibrium and adsorption coefficients at 523K. The residual sum of squares in case 3 was 0.22.

**Table S8:** Elementary reactions and rate equations (Case 5)

|                                                           | Elementary reactions                                                                                                                                                                                                                                                                                                                                                                                                                   | Rate equations                                                                                                                                                                           |
|-----------------------------------------------------------|----------------------------------------------------------------------------------------------------------------------------------------------------------------------------------------------------------------------------------------------------------------------------------------------------------------------------------------------------------------------------------------------------------------------------------------|------------------------------------------------------------------------------------------------------------------------------------------------------------------------------------------|
| <b>1<sup>st</sup> step -</b><br>H <sub>2</sub> formation  | $\text{H}_2\text{O} + * \leftrightarrow \text{H}_2\text{O}^*$<br>$\text{H}_2\text{O}^* + * \leftrightarrow \text{OH}^* + \text{H}^*$<br>$\text{CH}_3\text{OH} + * \leftrightarrow \text{CH}_3\text{OH}^*$<br>$\text{CH}_3\text{OH}^* + * \rightarrow \text{CH}_3\text{O}^* + \text{H}^* \quad \text{RDS}_1$<br>:<br>$\text{CO}^* + \text{OH}^* \rightarrow \text{H}^* + \text{CO}_2$<br>$2\text{H}^* \leftrightarrow \text{H}_2 + 2^*$ | $r_1 = k_1 \frac{K_{\text{CH}_3\text{OH}} C_{\text{CH}_3\text{OH}}}{(\text{DEN})^2}$                                                                                                     |
| <b>2<sup>nd</sup> step -</b><br>Hydroxyacetone formation  | $\text{G} + * \leftrightarrow \text{G}^*$<br>$\text{G}^* + * \rightarrow \text{HA}^* + \text{H}_2\text{O}^* \quad \text{RDS}_2$<br>$\text{HA}^* \leftrightarrow \text{HA} + *$                                                                                                                                                                                                                                                         | $r_2 = k_2 \frac{K_G C_G}{(\text{DEN})^2}$                                                                                                                                               |
| <b>3<sup>rd</sup> step –</b><br>1,2-propanediol formation | $\text{HA}^* + \text{H}^* \leftrightarrow \text{HAH}^* + *$ <b>RDS_3</b><br>$\text{HAH}^* + \text{H}^* \leftrightarrow 1,2\text{-PDO}^* + *$<br>$1,2\text{-PDO}^* \leftrightarrow 1,2\text{-PDO} + *$                                                                                                                                                                                                                                  | $r_3 = k_3 \frac{(K_{\text{H}_2} C_{\text{H}_2})^{-0.5} (K_{\text{HA}} C_{\text{HA}} K_{\text{H}_2} C_{\text{H}_2} - (K_{\text{PG}} C_{\text{PG}} (K_3 K_{\text{HA}}))}{(\text{DEN})^2}$ |

|                                                                                                        |                                                                                                               |       |                                                             |
|--------------------------------------------------------------------------------------------------------|---------------------------------------------------------------------------------------------------------------|-------|-------------------------------------------------------------|
| 4 <sup>th</sup> step –<br>ethylene glycol<br>formation                                                 | $G^* + H^* \rightarrow GH^* + *$<br>$GH^* + H^* \rightarrow EG^* + CH_3OH^*$<br>$EG^* \leftrightarrow EG + *$ | RDS_4 | $r_4 = k_4 \frac{K_G C_G (K_{H_2} C_{H_2})^{0.5}}{(DEN)^2}$ |
| *=active site, G=glycerol, 1,2-PDO=1,2-propanediol, EG=ethylene glycol, HA=hydroxyacetone, H =hydrogen |                                                                                                               |       |                                                             |

Where,

$$DEN = 1 + K_G C_G + K_{CH_3OH} C_{CH_3OH} + K_{HA} C_{HA} + K_{PG} C_{PG} + (K_{H_2} C_{H_2})^{0.5} + K_{PG} C_{PG} K_{HAH}^{-1} (K_{H_2} C_{H_2})^{-0.5}$$

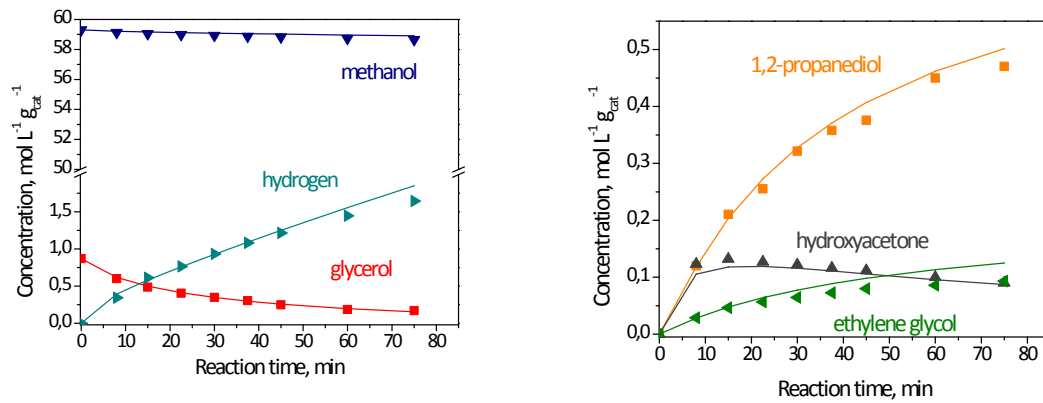

**Figure S8:** Experimental (points) and predicted (lines) values of reactants and products outlet concentrations as a function of reaction time (Case 5). Experimental conditions: aq. solution of 1wt% glycerol and 30wt% methanol,  $m_{\text{glycerol}}/m_{\text{catalyst}} = 2.4$ , 3.0MPa  $N_2$ , 523 K, 0-75min.

**Table S9:** Estimated values of kinetic parameters (Case5)

| Kinetic parameters | Step 1)<br>Methanol<br>APR | Step 2)<br>Glycerol<br>dehydration | Step 3)<br>Hydroxyacetone<br>hydrogenation | Step 4)<br>Glycerol<br>hydrogenolysis |
|--------------------|----------------------------|------------------------------------|--------------------------------------------|---------------------------------------|
|--------------------|----------------------------|------------------------------------|--------------------------------------------|---------------------------------------|

|                                      |                  |                  |                  |                  |
|--------------------------------------|------------------|------------------|------------------|------------------|
| $k_i, \text{min}^{-1} (523\text{K})$ | $3.1 \cdot 10^5$ | $1.5 \cdot 10^6$ | $8.4 \cdot 10^8$ | $3.8 \cdot 10^6$ |
|--------------------------------------|------------------|------------------|------------------|------------------|

| <b>Adsorption coefficients</b>                                                  |                     |                     |                        |                       |                     |
|---------------------------------------------------------------------------------|---------------------|---------------------|------------------------|-----------------------|---------------------|
|                                                                                 | <b>Methanol</b>     | <b>Glycerol</b>     | <b>1,2-propanediol</b> | <b>Hydroxyacetone</b> | <b>Hydrogen</b>     |
| $K_j, \text{g}_{\text{cat}} \cdot \text{L} \cdot \text{mol}^{-1} (523\text{K})$ | $1.4 \cdot 10^{-3}$ | $4.9 \cdot 10^{-2}$ | $1.1 \cdot 10^{-1}$    | 9.9                   | $7.2 \cdot 10^{-3}$ |
| <b>Equilibrium coefficient</b>                                                  |                     |                     |                        |                       |                     |
| <b>1,2-propanediol formation, <math>K_3</math></b>                              | 2.9                 |                     |                        |                       |                     |
